# Supplementary material
Source: HighWire-hosted journal article supplement (https://bmjopen.bmj.com/content/13/2/e066890)
Supplement: inline-supplementary-material-2 [file inline-supplementary-material-2.pdf]

# Claim standard for passing and mastery –

## Appendices

### Appendix 2 Personas

#### 1. Borderline understanding of the concepts.

When assessing the difficulty of each question for borderline understanding, please consider Samuel, a 14-year-old, year-8 student who recently came back to school after two years of being at home with no access to education due to nationwide COVID-19 related school closures. He reads English, but with some difficulty. English is not his first language.

Samuel is on the border between:

- having and not having a basic understanding of the nine key concepts and the ability to apply them,
- needing and not needing additional or alternative instruction, and
- being ready and not being ready to progress to other lessons to help him understand and apply the concepts.

#### 2. Mastery level of understanding of the concepts.

When assessing the difficulty of each question for mastery understanding, please consider Élise, a 14-year-old, year-8 student who has been out of school for most of the year due to nationwide COVID-19 related school closures but has had access to reading materials and occasionally watched some of the year-8 lessons delivered on national television. Élise, can read English with difficulty having switched from a predominantly French speaking school while in Grade 5. English is not her first language.

Élise is on the border between

- having mastered and not having mastered the nine key concepts,
- having a basic understanding of the concepts and how to apply them and having a clear understanding the concepts and how to apply them, and
- not needing and clearly not needing additional or alternative instruction and being ready to go on to other lessons which will reinforce learning of the same concepts and introduce new concepts.

*Informed Health Choices: Cut-off score study; Appendix 2*
