# Supplementary material
Source: HighWire-hosted journal article supplement (https://bmjopen.bmj.com/content/13/2/e066890)
Supplement: inline-supplementary-material-3 [file inline-supplementary-material-3.pdf]

## Claim standard for passing and mastery – Appendices

### Appendix 3 Summary of the Rasch Analysis Findings

#### Concepts, difficulty, and correct answers

| Item                                                | Concept                                                                                           | Difficulty* | Correct answer                                                                                                                |
|-----------------------------------------------------|---------------------------------------------------------------------------------------------------|-------------|-------------------------------------------------------------------------------------------------------------------------------|
| 1 Anne has pain in her ear                          | 4. Do not assume that personal experiences alone are sufficient.                                  | 59%         | B No, Hassan's experience is not enough to be sure                                                                            |
| 2 Sarah says that                                   | 5. Do not assume that a treatment is better based on how new or technologically impressive it is. | 58%         | B Yes, just because the medicine is expensive does not mean that it will work better than other medicines                     |
| 3 Edith has stomach pain.                           | 6. Do not assume that a treatment is helpful or safe based on how widely used it is or has been.  | 56%         | A Not very sure. Even though people have used fruit juice over many years, that does not mean that it helps stomach pain      |
| 4 John has a                                        | 5. Do not assume that a treatment is better based on how new or technologically impressive it is. | 56%         | A No, just because the skin cream is expensive does not mean that it will work better than other creams                       |
| 5 Sarah has a sickness                              | 9. Weigh the benefits and savings against the harms and costs of acting or not.                   | 55%         | B She should only take the medicine if she thinks it will help her more than it will harm her                                 |
| 6 Imagine you and your friends have                 | 7. Consider whether the people being compared were similar.                                       | 49%         | A By chance (like flipping a coin) to make sure the two groups are as similar as possible                                     |
| 7 Regina has a sickness                             | 1. Do not assume that treatments are safe.                                                        | 47%         | C Not very sure, because all medicines may harm people as well as help them                                                   |
| 8 Outside the city where Paul lives                 | 6. Do not assume that a treatment is helpful or safe based on how widely used it is or has been.  | 47%         | B Yes, we can only know for sure if the strong tea works if it has been compared with other treatments in studies             |
| 9 Jane often has headaches                          | 9. Weigh the benefits and savings against the harms and costs of acting or not.                   | 45%         | A If the medicine will help her more than it will hurt her, and if she thinks it is worth paying so much money for it         |
| 10 Mercy wanted to know if eating bananas makes you | 8. Be cautious of small studies.                                                                  | 44%         | B Less sure, because the difference between the two groups could have occurred by chance                                      |
| 11 Doctors studied people with stomach              | 3. Do not assume that comparisons are not needed.                                                 | 41%         | A No, taking the new medicine should have been compared either with not taking the medicine, or with taking an older medicine |
| 12 A new and an old mosquito spray                  | 8. Be cautious of small studies.                                                                  | 40%         | A Less sure, because only four houses were studied and the differences between sprays may have happened by chance             |
| 13 On the radio, there is someone                   | 2. Do not assume that treatments have large, dramatic effects.                                    | 39%         | C Not very sure. Very few treatments work so well                                                                             |
| 14 Dr. Javier has                                   | 3. Do not assume that comparisons are not needed.                                                 | 37%         | A No. The people who used the medicine were not compared with similar people who did not use the medicine                     |
| 15 George has stomach pain                          | 4. Do not assume that personal experiences alone are sufficient.                                  | 36%         | A It is not possible to say. His stomach pain might have gone away without the hot milk                                       |
| 16 Esther recommends a new treatment                | 2. Do not assume that treatments have large, dramatic effects.                                    | 35%         | A Not very sure. Very large benefits, where everyone or nearly everyone gets better because of a treatment are rare           |

*Informed Health Choices: Cut-off score study; Appendix 3*

---

|    |                     |                                                             |     |   |                                                                                                                   |
|----|---------------------|-------------------------------------------------------------|-----|---|-------------------------------------------------------------------------------------------------------------------|
| 17 | A doctor wanted     | 7. Consider whether the people being compared were similar. | 35% | C | Less sure, because the doctor should have given people one of the two treatments by chance (like flipping a coin) |
| 18 | Mary wanted to find | 1. Do not assume that treatments are safe.                  | 28% | A | It is not possible to say. Mary did not study possible harms of the plants                                        |

---

\*Higher percent = easier, Lower percent = more difficult

*Informed Health Choices: Cut-off score study; Appendix 3*
