# Supplementary material
Source: HighWire-hosted journal article supplement (https://bmjopen.bmj.com/content/13/2/e066890)
Supplement: inline-supplementary-material-4 [file inline-supplementary-material-4.pdf]

# Claim standard for passing and mastery – Appendices

## Appendix 4 Judges independent score about the difficulty of each MCQs.

| QN                          | 3.1 Anne has pain in her ear |          | 3.2 Sarah says that |          | 3.3 Edith has stomach pain. |          | 3.4 John has a |          | 3.5 Sarah has a sickness |          | 3.6 Imagine you and your friends have |          | 3.7 Regina has a sickness |          | 3.8 Outside the city where Paul lives |          | 3.9 Jane often has headaches |          | 3.10 Mercy wanted to know if eating bananas |          | 3.11 Doctors studied people with stomach |          | 3.12 A new and an old mosquito spray |          | 3.13 On the radio, there is someone |          | 3.14 Dr. Javier has |          | 3.15 George has stomach pain |          | 3.16 Esther recommends a new treatment | 3.17 A doctor wanted to find Cut-offs |         |          |         |          |    |    |
|-----------------------------|------------------------------|----------|---------------------|----------|-----------------------------|----------|----------------|----------|--------------------------|----------|---------------------------------------|----------|---------------------------|----------|---------------------------------------|----------|------------------------------|----------|---------------------------------------------|----------|------------------------------------------|----------|--------------------------------------|----------|-------------------------------------|----------|---------------------|----------|------------------------------|----------|----------------------------------------|---------------------------------------|---------|----------|---------|----------|----|----|
|                             | PASSING                      | MASTERY  | PASSING             | MASTERY  | PASSING                     | MASTERY  | PASSING        | MASTERY  | PASSING                  | MASTERY  | PASSING                               | MASTERY  | PASSING                   | MASTERY  | PASSING                               | MASTERY  | PASSING                      | MASTERY  | PASSING                                     | MASTERY  | PASSING                                  | MASTERY  | PASSING                              | MASTERY  | PASSING                             | MASTERY  | PASSING             | MASTERY  | PASSING                      | MASTERY  | PASSING                                | MASTERY                               | MASTERY | PASSING  | MASTERY |          |    |    |
| Judges                      | Initial                      | Adjusted | Initial             | Adjusted | Initial                     | Adjusted | Initial        | Adjusted | Initial                  | Adjusted | Initial                               | Adjusted | Initial                   | Adjusted | Initial                               | Adjusted | Initial                      | Adjusted | Initial                                     | Adjusted | Initial                                  | Adjusted | Initial                              | Adjusted | Initial                             | Adjusted | Initial             | Adjusted | Initial                      | Adjusted | Initial                                | Adjusted                              | Initial | Adjusted | Initial | Adjusted |    |    |
| J-001                       | 50                           | 80       | 10                  | 80       | 3                           | 50       | 5              | 70       | 5                        | 70       | 1                                     | 80       | 5                         | 70       | 0                                     | 80       | 3                            | 40       | 5                                           | 70       | 0                                        | 80       | 5                                    | 70       | 5                                   | 70       | 5                   | 70       | 5                            | 70       | 5                                      | 70                                    | 5       | 70       | 5       | 70       | 50 | 70 |
| J-002                       | 33                           | 40       | 10                  | 80       | 3                           | 40       | 0              | 80       | 3                        | 40       | 0                                     | 80       | 3                         | 40       | 0                                     | 80       | 3                            | 40       | 0                                           | 80       | 3                                        | 40       | 0                                    | 80       | 3                                   | 40       | 0                   | 80       | 3                            | 40       | 0                                      | 80                                    | 3       | 40       | 0       | 80       | 33 | 40 |
| J-003                       | 50                           | 60       | 10                  | 80       | 3                           | 40       | 5              | 70       | 5                        | 70       | 0                                     | 90       | 3                         | 40       | 0                                     | 60       | 5                            | 70       | 0                                           | 80       | 5                                        | 70       | 3                                    | 33       | 5                                   | 70       | 0                   | 60       | 0                            | 85       | 0                                      | 50                                    | 0       | 70       | 0       | 90       | 50 | 70 |
| J-004                       | 50                           | 40       | 10                  | 90       | 5                           | 40       | 0              | 90       | 0                        | 40       | 0                                     | 80       | 0                         | 60       | 0                                     | 90       | 0                            | 0        | 5                                           | 80       | 0                                        | 60       | 0                                    | 40       | 0                                   | 60       | 0                   | 30       | 0                            | 60       | 0                                      | 40                                    | 0       | 40       | 0       | 40       | 33 | 40 |
| J-005                       | 50                           | 40       | 10                  | 90       | 5                           | 30       | 5              | 40       | 5                        | 10       | 5                                     | 40       | 5                         | 40       | 0                                     | 40       | 5                            | 0        | 5                                           | 90       | 0                                        | 90       | 0                                    | 90       | 5                                   | 40       | 0                   | 30       | 0                            | 40       | 0                                      | 40                                    | 0       | 90       | 0       | 90       | 50 | 40 |
| J-006                       | 50                           | 85       | 10                  | 10       | 0                           | 80       | 0              | 0        | 0                        | 0        | 0                                     | 0        | 0                         | 0        | 0                                     | 0        | 0                            | 0        | 0                                           | 0        | 0                                        | 0        | 0                                    | 0        | 0                                   | 0        | 0                   | 0        | 0                            | 0        | 0                                      | 0                                     | 0       | 0        | 0       | 50       | 80 |    |
| J-007                       | 50                           | 75       | 10                  | 95       | 5                           | 75       | 5              | 75       | 0                        | 95       | 3                                     | 70       | 5                         | 75       | 0                                     | 95       | 3                            | 50       | 0                                           | 95       | 3                                        | 50       | 0                                    | 95       | 3                                   | 33       | 0                   | 90       | 3                            | 33       | 0                                      | 90                                    | 3       | 33       | 0       | 75       | 33 | 50 |
| J-008                       | 33                           | 40       | 50                  | 60       | 3                           | 30       | 5              | 80       | 0                        | 55       | 3                                     | 40       | 3                         | 38       | 3                                     | 45       | 0                            | 0        | 0                                           | 60       | 0                                        | 60       | 3                                    | 40       | 3                                   | 40       | 3                   | 45       | 0                            | 60       | 0                                      | 55                                    | 0       | 70       | 0       | 80       | 33 | 40 |
| Median                      | 46                           | 58       | 94                  | 84       | 8                           | 48       | 5              | 78       | 8                        | 55       | 5                                     | 76       | 2                         | 56       | 3                                     | 71       | 0                            | 56       | 4                                           | 88       | 0                                        | 58       | 8                                    | 83       | 6                                   | 54       | 2                   | 77       | 6                            | 56       | 8                                      | 81                                    | 6       | 56       | 5       | 79       | 7  | 49 |
| Low                         | 40                           | 60       | 30                  | 40       | 10                          | 40       | 38             | 40       | 0                        | 80       | 40                                    | 60       | 40                        | 40       | 30                                    | 60       | 40                           | 60       | 40                                          | 30       | 50                                       | 33       | 40                                   | 33       | 40                                  | 30       | 40                  | 30       | 40                           | 40       | 40                                     | 40                                    | 40      | 40       | 40      | 40       | 40 | 40 |
| High                        | 85                           | 10       | 80                  | 10       | 10                          | 10       | 90             | 10       | 10                       | 10       | 90                                    | 10       | 10                        | 10       | 80                                    | 10       | 80                           | 90       | 10                                          | 80       | 90                                       | 90       | 90                                   | 70       | 10                                  | 80       | 10                  | 70       | 90                           | 90       | 80                                     | 90                                    | 90      | 90       | 90      | 90       | 90 | 90 |
| Key Concept Correct answers | 4                            |          | 5                   |          | 6                           |          | 5              |          | 9                        |          | 7                                     |          | 1                         |          | 6                                     |          | 9                            |          | 8                                           |          | 3                                        |          | 8                                    |          | 2                                   |          | 3                   |          | 4                            |          | 2                                      |                                       | 7       |          | 1       |          |    |    |
| Rasch Chance                | 59%                          |          | B                   |          | A                           |          | A              |          | B                        |          | A                                     |          | C                         |          | B                                     |          | A                            |          | B                                           |          | A                                        |          | A                                    |          | C                                   |          | A                   |          | A                            |          | A                                      |                                       | C       |          | A       |          |    |    |
| Consensus                   | 50%                          | 85%      | 40%                 | 80%      | 53%                         | 80%      | 50%            | 78%      | 55%                      | 85%      | 55%                                   | 85%      | 45%                       | 80%      | 55%                                   | 80%      | 55%                          | 80%      | 40%                                         | 70%      | 40%                                      | 60%      | 43%                                  | 73%      | 55%                                 | 70%      | 50%                 | 80%      | 60%                          | 85%      | 45%                                    | 80%                                   | 45%     | 80%      | 40%     | 75%      |    |    |

**Key Concepts**  
 1. Do not assume that treatments are safe.  
 2. Do not assume that treatments have large, dramatic effects.  
 3. Do not assume that comparisons are not needed.  
 4. Do not assume that personal experiences alone are sufficient.  
 5. Do not assume that a treatment is better based on how new or technologically impressive it is.

Informed Health Choices: Cut-off score study; Appendix 4

6. Do not assume that a treatment is helpful or safe based on how widely used it is or has been.
7. Consider whether the people being compared were similar.
8. Be cautious of small studies.
9. Weigh the benefits and savings against the harms and costs of acting or not.
